# Supplementary material
Source: PubMed Central journal article supplement (PMC4160876)
Supplement: NIHMS608474-supplement-1.pdf [file NIHMS608474-supplement-1.pdf]

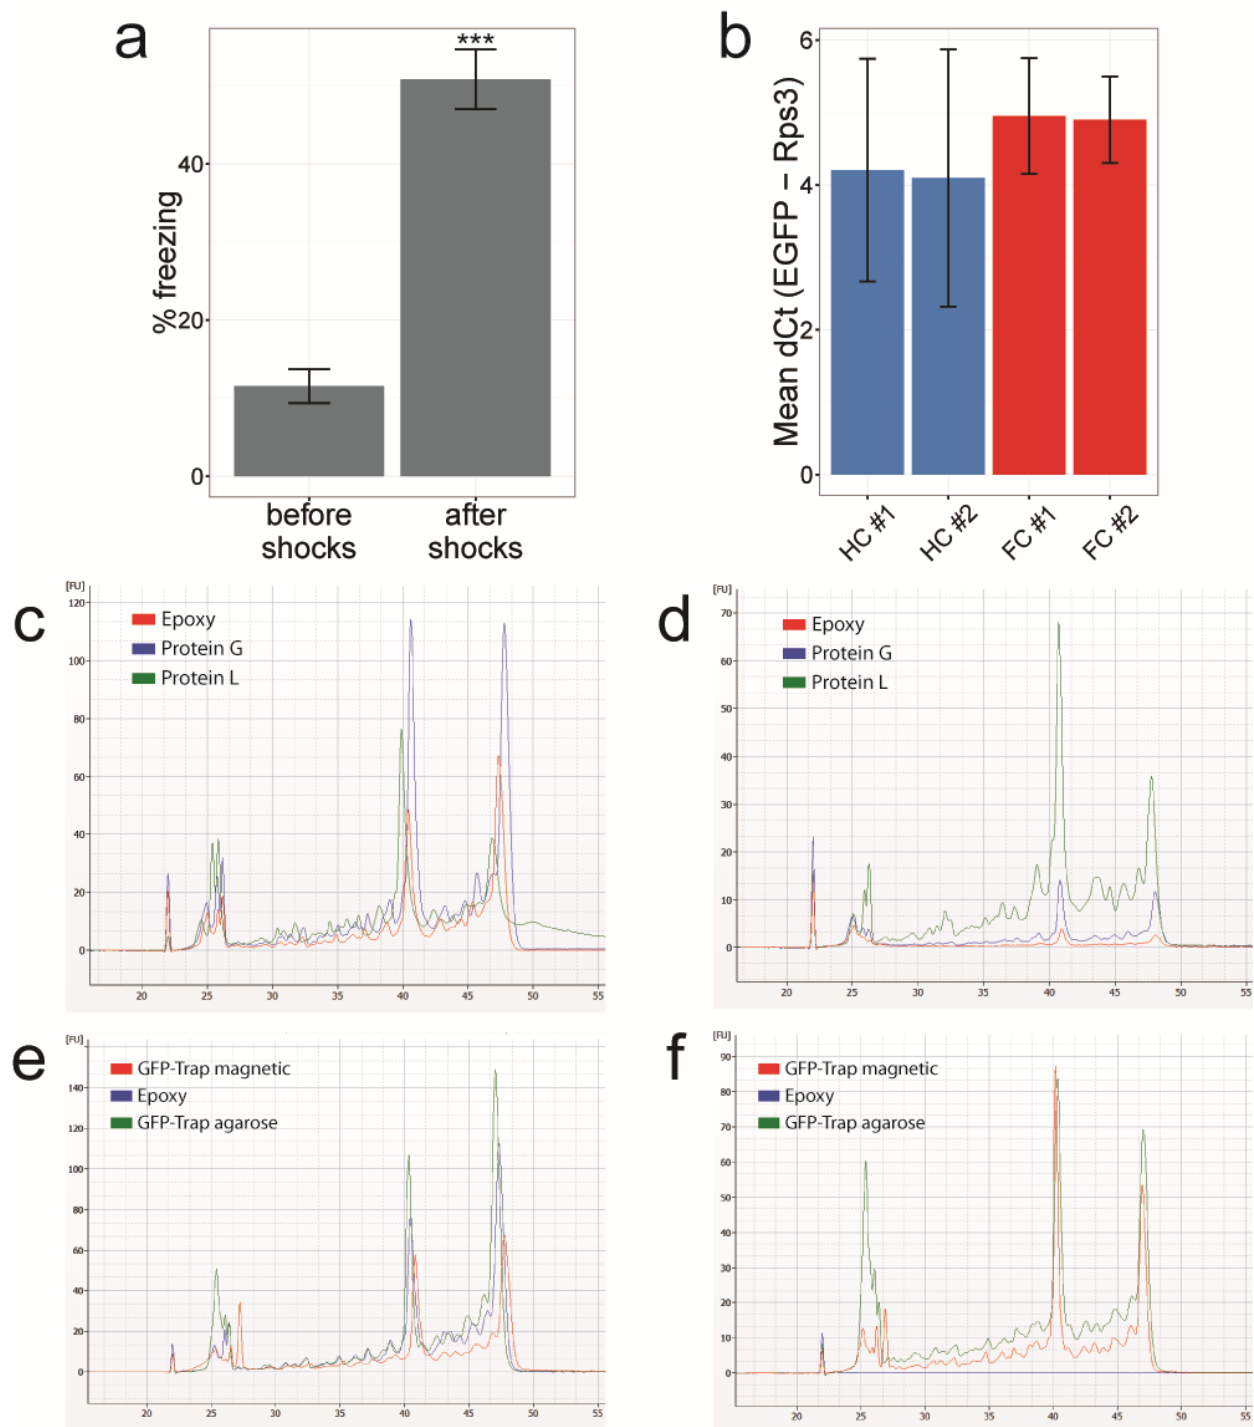

**Supplementary Figure 1: Collection of ribosome-bound mRNA from transgenic Camk2a-tTA, tetO-EGFP-L10a mice using an improved protocol for low background ribosome immunoprecipitation.** (a) Camk2a-tTA, tetO-EGFP-L10a transgenic mice showed normal fear conditioning. Average percent of time spent freezing for mice before-shocks (minute 2-3 of the protocol) and after-shocks (final 40 seconds of the protocol). (n=8, bars represent SEM, \*\*\* =  $p < 0.0001$  using paired t-test). (b) Home cage and fear conditioning mice had similar EGFP-L10a

expression. EGFP-L10a expression was measured with qPCR and normalized to Rps3. Mean delta Ct (dCt) was calculated by averaging the dCt for the dendrite IP, dendrite SN, soma IP, and soma SN for each individual mouse. Bars represent SEM. (c-f) Representative Bioanalyzer traces comparing RNA levels for EGFP immunoprecipitation protocols detailed in the Methods. (c&d) Comparison of EGFP immunoprecipitation protocols either using Protein G or Protein L-coated magnetic beads bound to two anti-GFP antibodies or using a glycidyl ether (epoxy) reactive group to covalently link a single anti-GFP antibody to the bead. (c) 10% of a Camk2a-tTA, tetO-EGFP-L10a double transgenic whole brain homogenate was used as input. (d) 10% of a tetO-EGFP-L10a single transgenic whole brain homogenate was used as input as a background control. The epoxy beads resulted in the lowest background level. (e&f) Comparison of GFP-Trap magnetic and agarose beads (ChromoTek) with epoxy beads. (e) 10% of a Camk2a-tTA, tetO-EGFP-L10a double transgenic whole brain homogenate was used as input. (f) 10% of a tetO-EGFP-L10a single transgenic whole brain homogenate was used as input. The epoxy beads again resulted in the lowest background level.

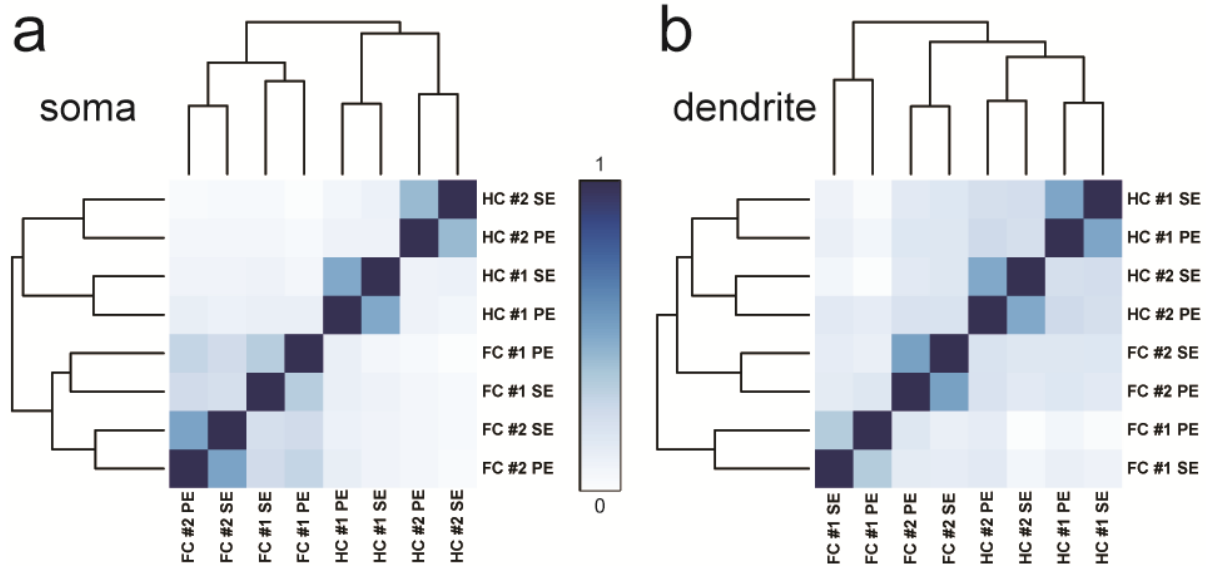

**Supplementary Figure 2: Clustering of RNA-Seq IP data.** (a,b) Blinded clustering of normalized read counts shows that the immunoprecipitation (IP) samples of the contextual fear conditioned mice cluster apart from the IP samples of the home cage mice, indicating that fear conditioning altered ribosome binding in both the soma (a) and dendrites (b) of CA1 pyramidal neurons. Intensity of blue color represents degree of similarity between samples. Dendrograms on the left and top show the relationship between samples. SE = single end library. PE = paired end library.

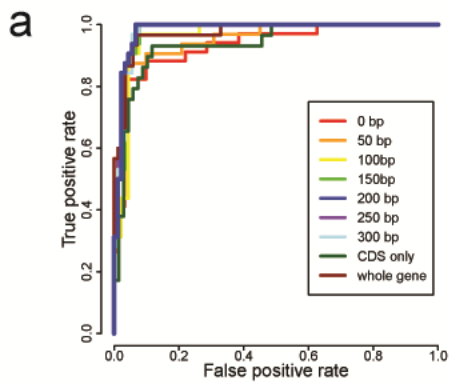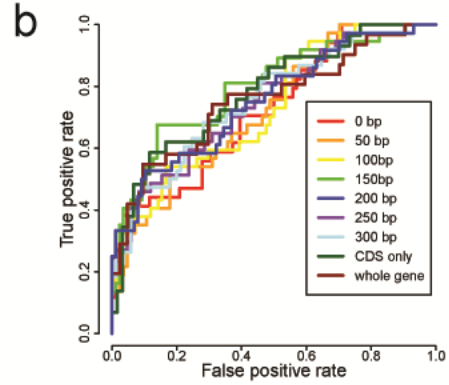

**c**

| Split      | Accuracy | Sensitivity | Specificity | AUC       | K-1 fold cross validation | Dendritic Genes | Total Genes |
|------------|----------|-------------|-------------|-----------|---------------------------|-----------------|-------------|
| 000 bp     | 0.928    | 0.8235      | 0.967       | 0.9343891 | 90.4                      | 1501            | 5637        |
| 050 bp     | 0.9431   | 0.875       | 0.967       | 0.9508929 | 91.05691                  | 1554            | 5516        |
| 100 bp     | 0.935    | 0.875       | 0.956       | 0.9632555 | 88.61789                  | 1410            | 5517        |
| 150 bp     | 0.9421   | 0.875       | 0.9663      | 0.9778792 | 86.77686                  | 1410            | 5505        |
| 200 bp     | 0.9344   | 0.9062      | 0.9444      | 0.9819444 | 90.16393                  | 1890            | 5478        |
| 250 bp     | 0.9344   | 0.8438      | 0.9667      | 0.9798611 | 90.16393                  | 1483            | 5426        |
| 300 bp     | 0.9344   | 0.8438      | 0.9667      | 0.9784722 | 90.98361                  | 1693            | 5388        |
| CDS only   | 0.8247   | 0.4828      | 0.9706      | 0.9366126 | 81.4433                   | 685             | 3458        |
| whole gene | 0.887    | 0.6667      | 0.9647      | 0.9737255 | 88.69565                  | 1095            | 4659        |

**d**

| Split      | Accuracy | Sensitivity | Specificity | AUC       | K-1 fold cross validation | Dendritic Genes | Total Genes |
|------------|----------|-------------|-------------|-----------|---------------------------|-----------------|-------------|
| 000 bp     | 0.5417   | 0.8529      | 0.4186      | 0.7253762 | 47.5                      | 4562            | 5222        |
| 050 bp     | 0.7355   | 0.24324     | 0.95238     | 0.7232947 | 44.6281                   | 611             | 5174        |
| 100 bp     | 0.7355   | 0.5405      | 0.8214      | 0.7326255 | 42.97521                  | 2314            | 5122        |
| 150 bp     | 0.6423   | 0.8108      | 0.5698      | 0.7960402 | 56.09756                  | 3913            | 5059        |
| 200 bp     | 0.6829   | 0.5833      | 0.7241      | 0.7525543 | 37.39837                  | 2843            | 5059        |
| 250 bp     | 0.6033   | 0.8108      | 0.5119      | 0.7503218 | 54.54545                  | 4180            | 5013        |
| 300 bp     | 0.6016   | 0.8421      | 0.4941      | 0.7563467 | 57.72358                  | 4229            | 4983        |
| CDS only   | 0.7079   | 0.13793     | 0.98333     | 0.7804598 | 68.53933                  | 204             | 2856        |
| whole gene | 0.7652   | 0.12903     | 1           | 0.7549923 | 74.78261                  | 117             | 4097        |

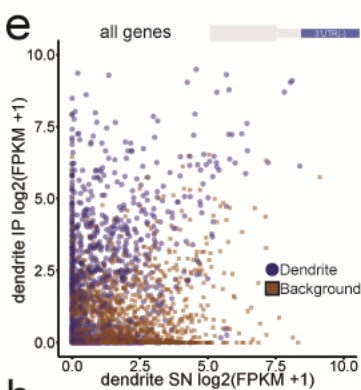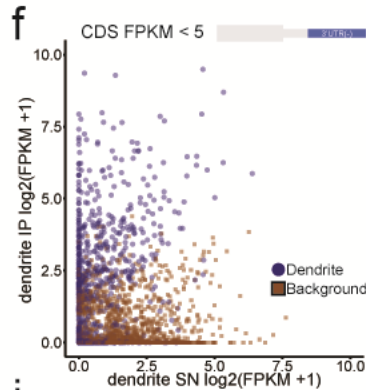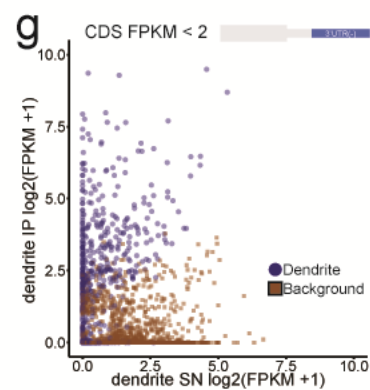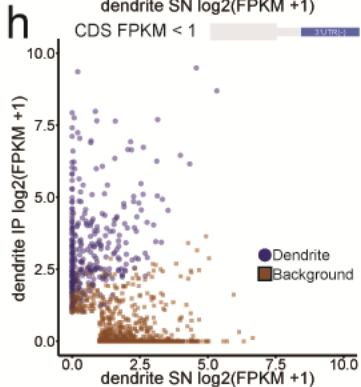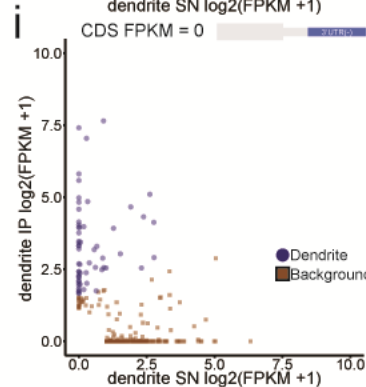

**Supplementary Figure 3: Classification results on dendrite data using different 3'UTR splits.**

(a) Receiver operating characteristic (ROC) curves for contextual fear conditioning dendritic RNA-Seq data with the indicated custom gene models. Whole gene = unaltered UCSC mm9 gene models were used for gene expression quantification with Cufflinks. CDS only = coding sequence models only. 0-300bp = each gene was split into two portions at the indicated distance from the stop codon before expression quantification. (b) ROC curves for home cage dendritic RNA-Seq data with the indicated custom gene models. (c) Table of contextual fear conditioning dendritic RNA-Seq classification results for each gene model. Using the Area Under the ROC Curve (AUC) as a metric combining both sensitivity and specificity, the split at 200bp yields the best results. (d) Table of home cage dendritic RNA-Seq classification results for each gene model. All gene models show poor classification results as predicted by the unclear separation between +pyr and -pyr genes (Fig. 3d). (e) Scatterplot of contextual fear conditioning  $\text{FPKM}^{3'\text{UTR}(-)}$  data showing classification results for all genes. (f) Similar as (e) for genes with  $\text{FPKM}^{\text{CDS}(+)} < 5$ . (g) Similar as (e) for genes with  $\text{FPKM}^{\text{CDS}(+)} < 2$ . (h) Similar as (e) for genes with  $\text{FPKM}^{\text{CDS}(+)} < 1$ . (i) Similar as (e) for genes with  $\text{FPKM}^{\text{CDS}(+)} = 0$ . A clear separation between dendritic and background classification becomes apparent when plotting the  $\text{FPKM}^{3'\text{UTR}(-)}$  values for mRNAs with lower  $\text{FPKM}^{\text{CDS}(+)}$  values, illustrating how both the  $\text{FPKM}^{\text{CDS}(+)}$  and  $\text{FPKM}^{3'\text{UTR}(-)}$  values contribute to classification with highest accuracy.

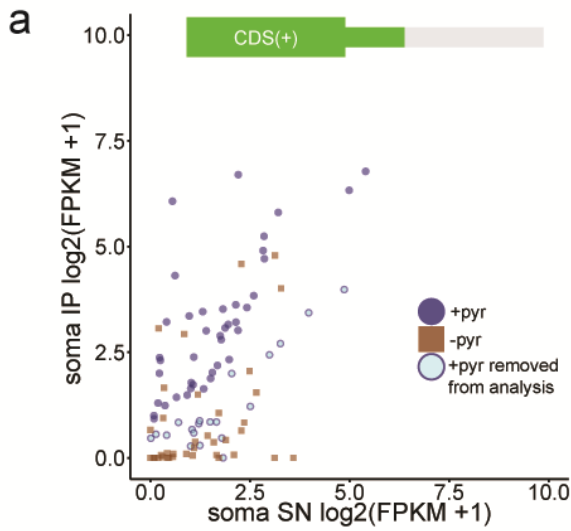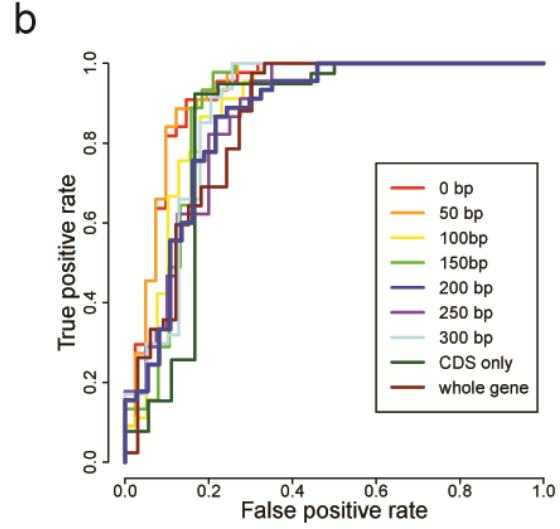

**c**

| Split      | Accuracy | Sensitivity | Specificity | AUC       | K-1 fold cross validation | Somatic Genes | Total Genes |
|------------|----------|-------------|-------------|-----------|---------------------------|---------------|-------------|
| 000 bp     | 0.7529   | 0.5909      | 0.9268      | 0.9201774 | 74.11765                  | 1647          | 5937        |
| 050 bp     | 0.7765   | 0.6591      | 0.9024      | 0.922949  | 74.11765                  | 1965          | 5896        |
| 100 bp     | 0.7143   | 0.5556      | 0.8974      | 0.8871795 | 67.85714                  | 1478          | 5853        |
| 150 bp     | 0.7229   | 0.6         | 0.8684      | 0.8847953 | 68.6747                   | 1670          | 5812        |
| 200 bp     | 0.8293   | 0.8667      | 0.7838      | 0.8624625 | 73.17073                  | 2903          | 5778        |
| 250 bp     | 0.7176   | 0.6444      | 0.8         | 0.8661111 | 70.58824                  | 2411          | 5755        |
| 300 bp     | 0.7093   | 0.5745      | 0.8718      | 0.8788871 | 65.11628                  | 1901          | 5728        |
| CDS only   | 0.7544   | 1           | 0.2222      | 0.8433048 | 73.68421                  | 3254          | 3410        |
| whole gene | 0.72     | 0.619       | 0.8485      | 0.8556999 | 62.66667                  | 1849          | 4923        |

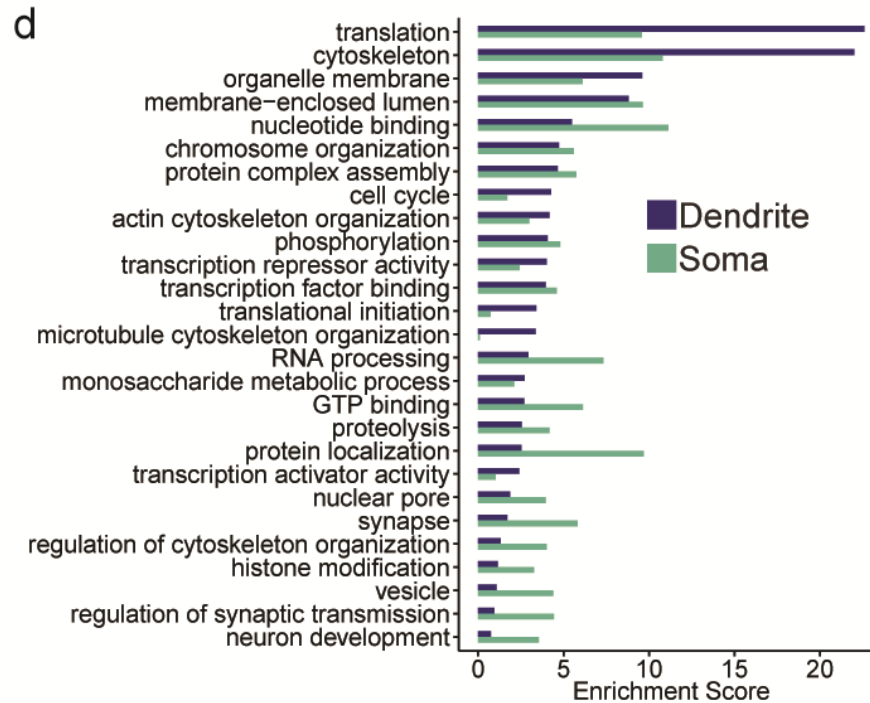

**Supplementary Figure 4: Classification results for contextual fear conditioning soma RNA-Seq data using different 3'UTR splits.** (a) +pyr and -pyr IP CDS(+) scatterplots for contextual fear conditioning soma. Genes with an IP/SN ratio  $< 1$  were assumed to be present in pyramidal neurons but not bound to ribosomes at sufficient levels for IP enrichment and were excluded as training genes in the classification for the somatic data. (b) ROC curves for contextual fear conditioning somatic RNA-Seq data with the indicated custom gene models as detailed in Supplementary Fig. 3. The line for the 200bp split is highlighted. (c) Table of classification results for each gene model. While the 200bp CDS(+)/3'UTR(-) split gene model does not have the highest area under the ROC curve (AUC), it does have the best balance between sensitivity and specificity and was used for final classification results. (d) Top 20 enriched GO categories for dendritic and somatic mRNAs organized by level of dendritic enrichment.

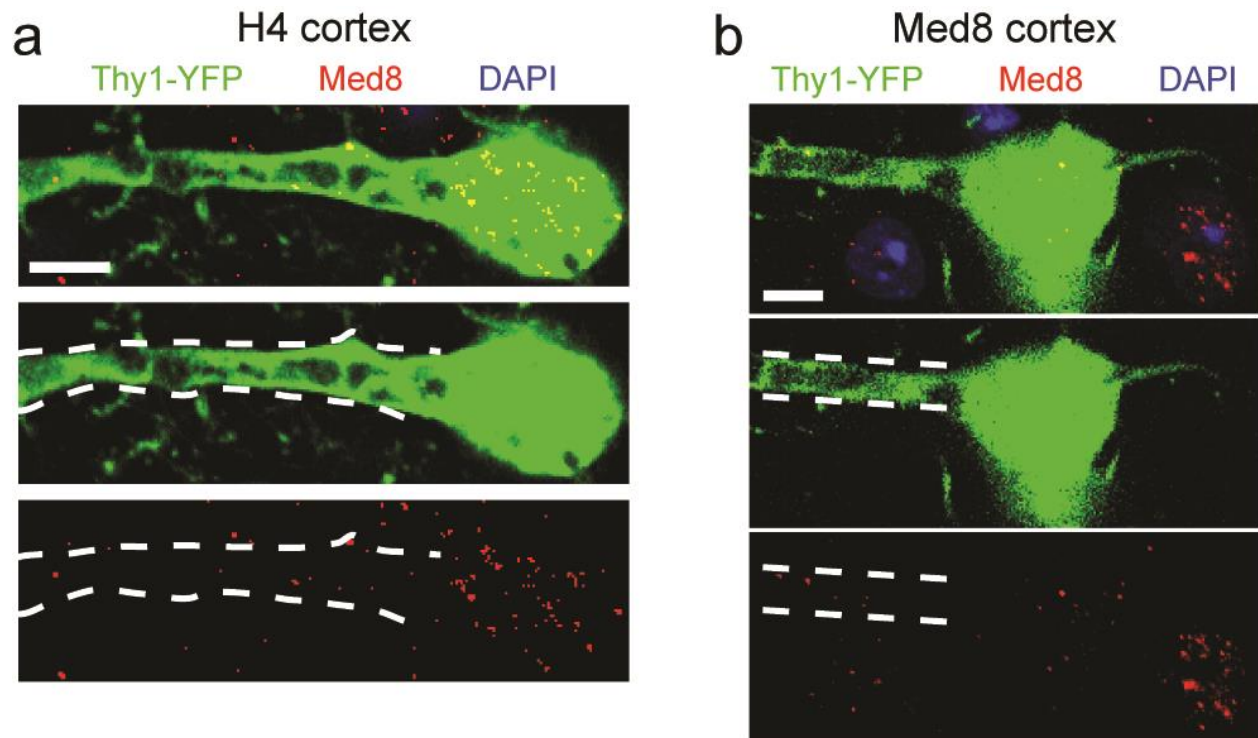

**Supplementary Figure 5: Detection of Histone H4 and Med8 proteins within dendrites of cortical pyramidal neurons.** (a) Immunohistochemical labeling of Histone H4 in a Thy1-YFP labeled cortical neuron. red = Histone H4, green = Thy1-YFP. The dashed white lines outline the dendrite. (b) Immunohistochemical labeling of Med8 in Thy1-YFP labeled cortical neuron. red = Med8, green = Thy1-YFP, blue = DAPI. The dashed white lines outline the dendrite. Scale Bars = 10 $\mu$ m.



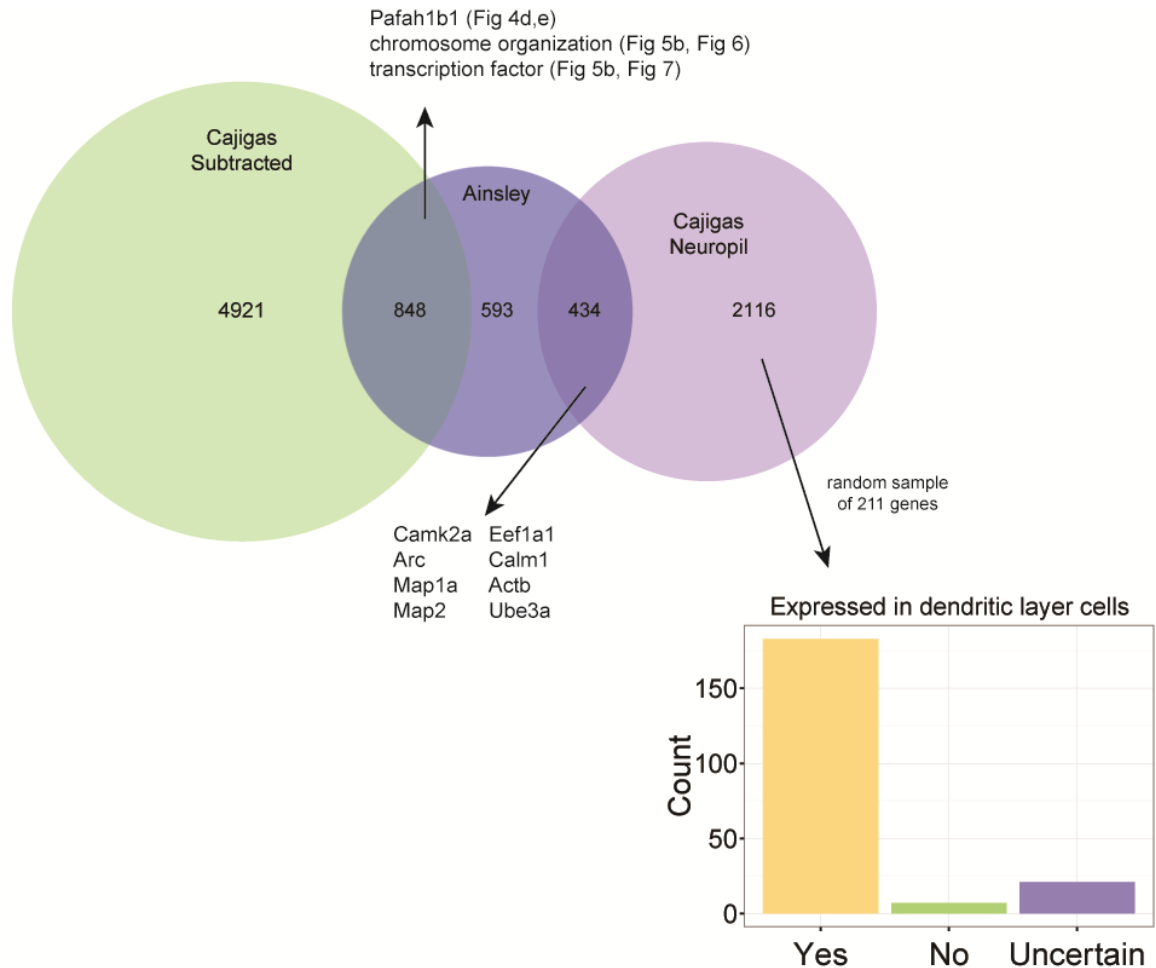

**Supplementary Figure 6. Comparison between dendritic gene lists from current study and Cajigas, et. al.** The Venn diagram shows the overlap between the current study (Ainsley), the filtered list of neuropil genes identified by Cajigas, et. al.<sup>1</sup> (Cajigas Neuropil), and the list of genes subtracted from the neuropil gene list (Cajigas Subtracted) in Cajigas, et. al. for reasons including expression in non-pyramidal neuron cell types or association with nuclear functions. The 434 genes identified by both studies include common dendritic transcripts (8 examples listed). The 848 genes that are in both Ainsley and Cajigas Subtracted could represent false negatives in Cajigas, et. al., as confirmed for 3 genes that fall within subtracted categories (Fig. 4d,e, Fig. 6, Fig. 7). A random sample of 10% of the 2116 genes detected by Cajigas, et. al., but not by our study, were screened using Allen Mouse Brain Atlas *in situ* for expression within cells in the dendritic layer (i.e. cells located in the stratum lacunosum moleculare or stratum radiatum of the CA1 region of the hippocampus). A gene was labeled as Yes if expression could be seen in dendritic layer cells, No if expression was limited to the stratum pyramidale (location of pyramidal cell bodies), and Uncertain if the *in situ* experiment was inconclusive or did not exist (see Supplementary Data 4). These data are summarized in the bar chart. Cajigas, et. al. employed microdissection of the dendritic layer followed by RNA-Seq of all collected mRNA transcripts. This method does not allow the prediction of dendritic localization of mRNAs that are also present in dendritic layer cells. While extensive filtering was used to remove mRNAs that could have originated from dendritic layer cells, *in situ* experiments from the Allen Mouse

Brain Atlas show that the vast majority of the Cajigas Neuropil genes not identified in our study show expression in dendritic layer cells and represent potential false positives in Cajigas, et. al. (87% including all randomly sampled genes, 96% excluding genes labeled Uncertain).

| Mouse | Behavior         | Location | Sample            | Sequencing Type | Total Reads | STAR Alignments | STAR Uniques |
|-------|------------------|----------|-------------------|-----------------|-------------|-----------------|--------------|
| HC#1  | home cage        | dendrite | immunoprecipitate | single end      | 8177076     | 2448748         | 1445297      |
| HC#1  | home cage        | soma     | immunoprecipitate | single end      | 8857590     | 2569133         | 1638686      |
| HC#1  | home cage        | dendrite | immunoprecipitate | paired end      | 64774840    | 22663322        | 13839586     |
| HC#1  | home cage        | soma     | immunoprecipitate | paired end      | 131280050   | 42852341        | 30592880     |
| HC#2  | home cage        | dendrite | immunoprecipitate | single end      | 2217975     | 564322          | 298102       |
| HC#2  | home cage        | dendrite | supernatant       | single end      | 12639045    | 11777311        | 7344906      |
| HC#2  | home cage        | soma     | immunoprecipitate | single end      | 8546990     | 4763727         | 2058849      |
| HC#2  | home cage        | dendrite | immunoprecipitate | paired end      | 214610116   | 66945555        | 42993182     |
| HC#2  | home cage        | dendrite | supernatant       | paired end      | 93163380    | 87606290        | 74757988     |
| HC#2  | home cage        | soma     | immunoprecipitate | paired end      | 73420060    | 41391241        | 32773341     |
| FC#1  | fear conditioned | dendrite | immunoprecipitate | single end      | 9107338     | 3614656         | 2402299      |
| FC#1  | fear conditioned | soma     | immunoprecipitate | single end      | 8285494     | 4566140         | 3667054      |
| FC#1  | fear conditioned | dendrite | immunoprecipitate | paired end      | 108448502   | 86803138        | 57233931     |
| FC#1  | fear conditioned | soma     | immunoprecipitate | paired end      | 77679718    | 51637767        | 43115178     |
| FC#2  | fear conditioned | dendrite | immunoprecipitate | single end      | 8874255     | 3025743         | 1788058      |
| FC#2  | fear conditioned | dendrite | supernatant       | single end      | 8632308     | 7966387         | 4587254      |
| FC#2  | fear conditioned | soma     | immunoprecipitate | single end      | 9308237     | 4525411         | 2729574      |
| FC#2  | fear conditioned | soma     | supernatant       | single end      | 8134420     | 7646754         | 3891759      |
| FC#2  | fear conditioned | dendrite | immunoprecipitate | paired end      | 149105624   | 74577311        | 46498876     |
| FC#2  | fear conditioned | dendrite | supernatant       | paired end      | 87811136    | 87791965        | 75868211     |
| FC#2  | fear conditioned | soma     | immunoprecipitate | paired end      | 134445102   | 82517092        | 64079881     |
| FC#2  | fear conditioned | soma     | supernatant       | paired end      | 64056566    | 62358423        | 52178497     |

**Supplementary Table 1: Summary table of all mice used for RNA-Seq experiments.**

### Supplementary Reference

1. Cajigas, I. J. *et al.* The Local Transcriptome in the Synaptic Neuropil Revealed by Deep Sequencing and High-Resolution Imaging. *Neuron* **74**, 453–466 (2012).
